# Supplementary material
Source: PubMed Central journal article supplement (PMC3397267)
Supplement: mmc1.pdf [file mmc1.pdf]

The American Journal of Human Genetics, Volume 91

## **Supplemental Data**

### **Ethiopian Genetic Diversity Reveals Linguistic Stratification and Complex Influences on the Ethiopian Gene Pool**

Luca Pagani, Toomas Kivisild, Ayele Tarekegn, Rosemary Ekong, Chris Plaster, Irene Gallego Romero, Qasim Ayub, S. Qasim Mehdi, Mark G. Thomas, Donata Luiselli, Endashaw Bekele, Neil Bradman, David J. Balding, and Chris Tyler-Smith



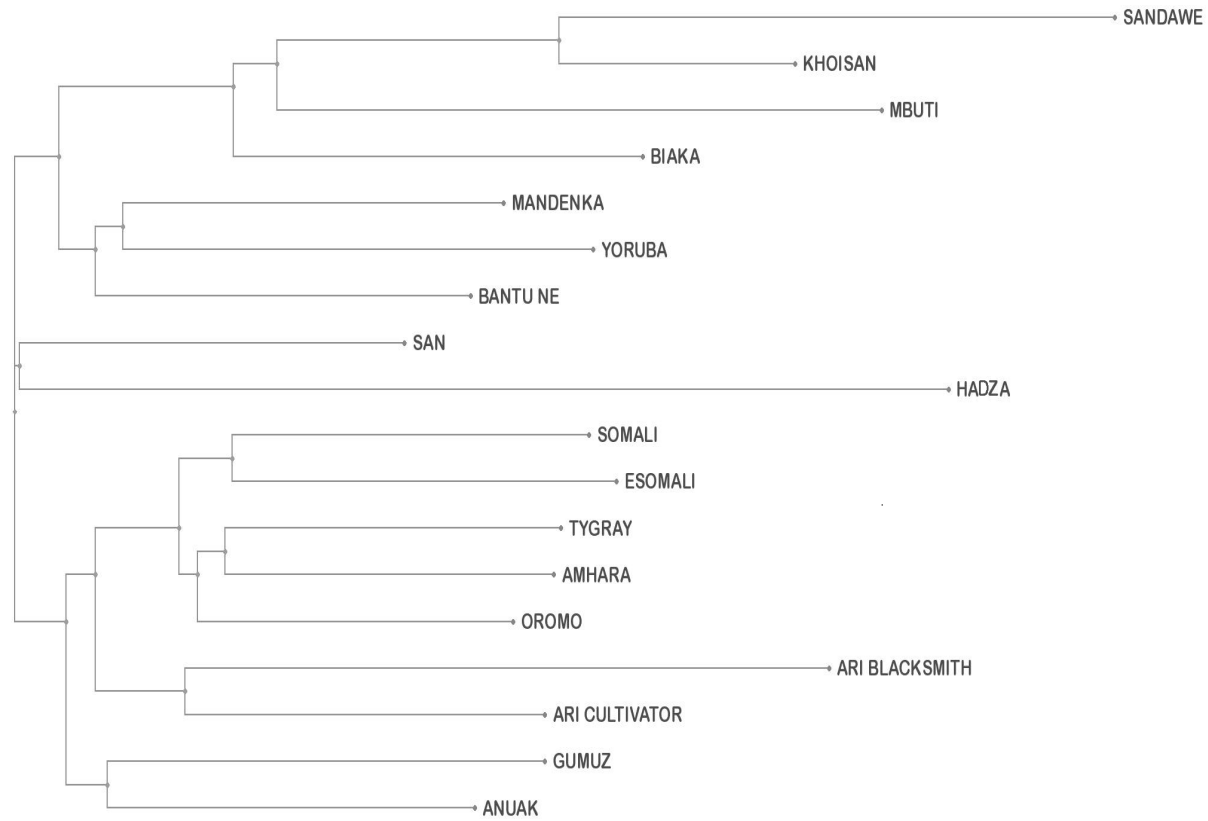

**Figure S2. Neighbor-Joining Tree**

The genetic distance ( $F_{st}$ ) calculated on the African component only was used to draw a neighbor-joining tree of the studied Sub-Saharan and Ethiopian populations.

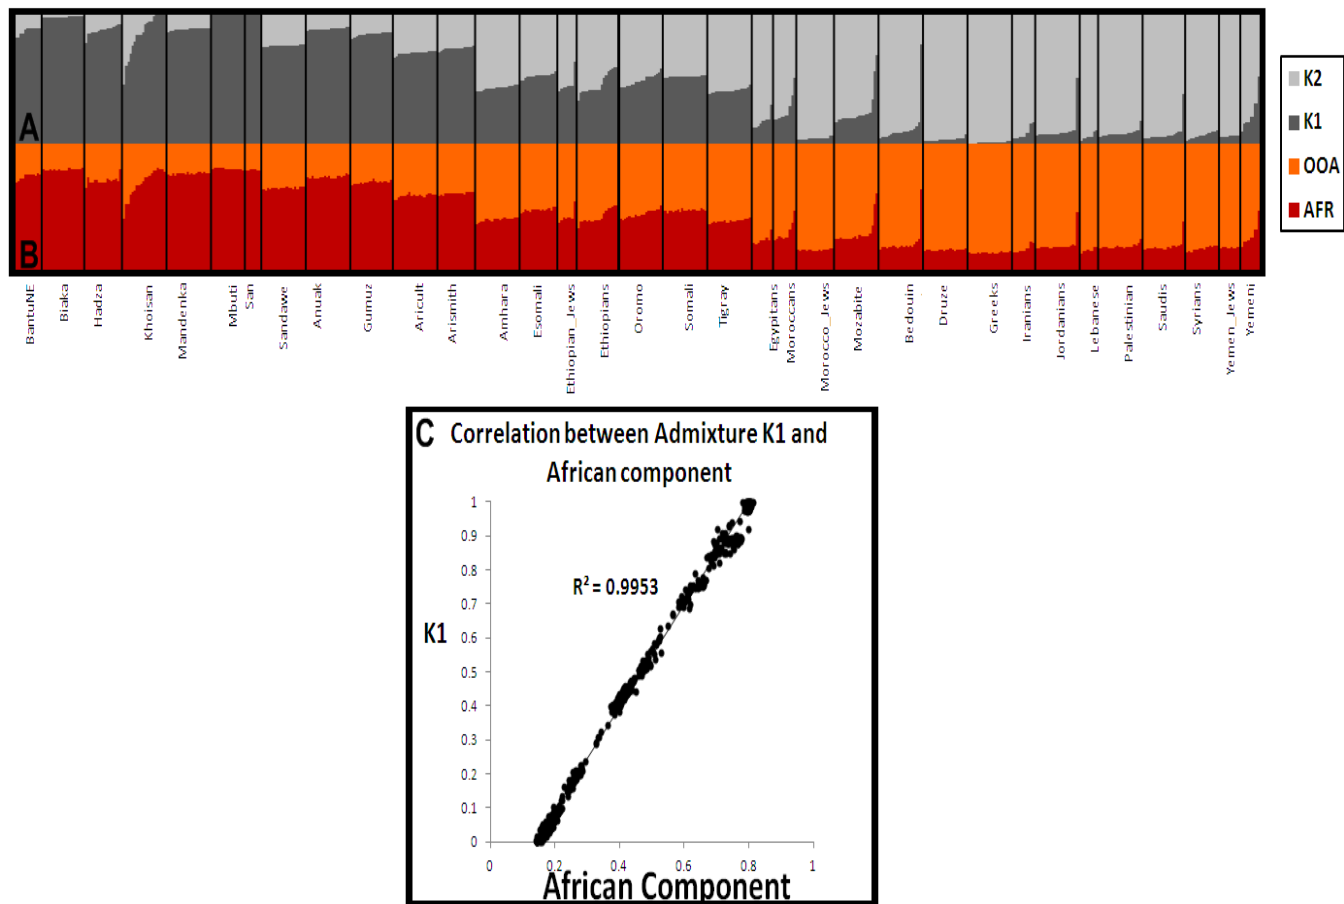

**Figure S3. Comparison between the PCA-Based Genome Partitioning and the ADMIXTURE Results**

A maximum of 20 pruned samples were processed in ADMIXTURE with K=2 (A) and PCA-based genome partitioning (B). The correlation ( $r^2$ ) between the K1 and the African components from these plots is displayed in C.

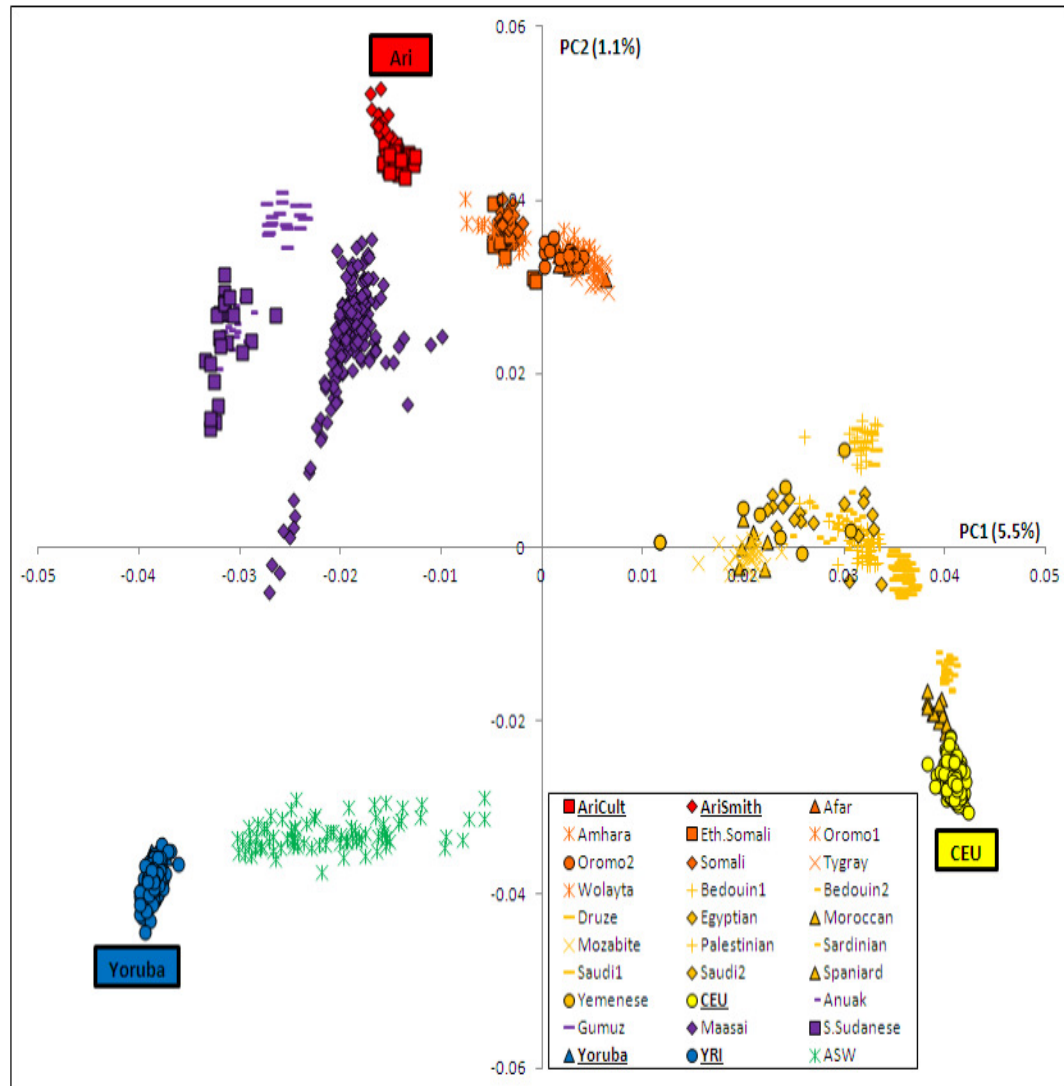

**Figure S4. PCA Plot of African, West Asian, and European Samples**

The Yoruba (blue), CEU (Yellow) and Ari (Red) define a triangular shape with the other samples analyzed (colored according to their position between the three primary colors) distributed on its three sides.

**Table S1. Sample Size, Location, and Sociological Features of the Genotyped Populations**

| <b>Pop</b>       | <b>N</b> | <b>Lat</b> | <b>Long</b> | <b>Elev</b> | <b>Geo. Location</b> | <b>Ling. Group</b> | <b>Language</b> | <b>1998 Census</b> | <b>Endo/ Exogamous</b> | <b>Patri/ Matriloc al</b> | <b>Mono/ Polyga mous</b> | <b>Patri/ Matrilineal</b> | <b>High/ Lowland</b> | <b>Food Production</b>                    |
|------------------|----------|------------|-------------|-------------|----------------------|--------------------|-----------------|--------------------|------------------------|---------------------------|--------------------------|---------------------------|----------------------|-------------------------------------------|
| Afar             | 12       | 12         | 41          | 379         | Wag Hemra Zone       | Cushitic           | Xamtan          | 143369             | Endo                   | Patrilocal                | Poly                     | Patrilineal               | Highland             | Agriculturalist                           |
| Amhara           | 26       | 10         | 39          | 2088        | Amhara Region        | Semitic            | Amharic         | 17372913           | Endo                   | Patrilocal                | Mono                     | Patrilineal               | Highland             | Agriculturalist                           |
| Anuak            | 23       | 8          | 34          | 500         | Gambella             | Nilotic            | Anuak           | 45646              | Endo                   | Patrilocal                | Poly                     | Patrilineal               | Lowland              | Mixed Farming                             |
| Ari Blacksmith   | 17       | 6          | 37          | 1348        | South Omo            | Omotic             | Ari             | 158857             | Endo                   | Patrilocal                | Poly                     | Patrilineal               | Highland             | Agriculturalist                           |
| Ari Cultivator   | 24       | 6          | 37          | 1348        | South Omo            | Omotic             | Ari             | 158857             | Endo                   | Patrilocal                | Poly                     | Patrilineal               | Highland             | Agriculturalist                           |
| Ethiopian Somali | 17       | 9          | 42          | 1543        | Somali Region        | Cushitic           | Somali          | 3334113            | Endo                   | Patrilocal                | Poly                     | Patrilineal               | Lowland              | Pastoralist                               |
| Gumuz            | 19       | NA         | NA          | NA          | Beni-Shangul Gumuz   | Nilo-Saharan       | Gumuz           | 120424             | Endo                   | Patrilocal                | Poly                     | Patrilineal               | Lowland              | Pastoralist                               |
| Oromo            | 21       | 8          | 37          | 1758        | Oromia Region        | Cushitic           | Oromo           | Ca. 17000000       | Endo                   | Patrilocal                | Mono/Pol y               | Patrilineal               | Highland             | Agriculturalist/Mixed Farming/Pastoralist |
| Somali           | 23       | NA         | NA          | NA          | NA                   | NA                 | NA              | NA                 | NA                     | NA                        | NA                       | NA                        | NA                   | NA                                        |
| South Sudanese   | 24       | NA         | NA          | NA          | NA                   | NA                 | NA              | NA                 | NA                     | NA                        | NA                       | NA                        | NA                   | NA                                        |
| Tigray           | 21       | 9          | 38          | 1696        | Tigray Region        | Semitic            | Tigrayan        | 3224875            | Endo                   | Patrilocal                | Mono                     | Patrilineal               | Highland             | Agriculturalist                           |
| Wolayta          | 8        | 6          | 37          | 1737        | Wolayta Zone         | Omotic             | Wolayta         | 1231673            | Endo                   | Patrilocal                | Mono                     | Patrilineal               | Highland             | Agriculturalist                           |

**Table S2. Genomic Average Heterozygosity and  $F_{ST}$**

Calculated using the same pruned SNPs as for the genome partitioning. The values here formed the basis of the heat maps in Figure 2.

**(This table is available as a supplemental Excel file)**

Table S3. Minimum Pairwise Genetic Distance in Whole Genome (A) and Non-African Component Only (B) between Ethiopians and Surrounding Populations to Compare with the  $F_{ST}$  Results Reported in Figure 3

| <b>A</b> | Whole Genome | Bedouin | Druze  | Egyptian      | Greek  | Iranian | Jordanian | Lebanese | Moroccan | Mozabite | Palestinian | Saudi  | Syrian | Yemeni        |
|----------|--------------|---------|--------|---------------|--------|---------|-----------|----------|----------|----------|-------------|--------|--------|---------------|
|          | AMHARA       | 0.0382  | 0.0383 | 0.0381        | 0.0387 | 0.0387  | 0.0384    | 0.0383   | 0.0380   | 0.0387   | 0.0385      | 0.0381 | 0.0384 | 0.0383        |
|          | ESOMALI      | 0.0380  | 0.0383 | 0.0380        | 0.0385 | 0.0385  | 0.0382    | 0.0381   | 0.0377   | 0.0387   | 0.0383      | 0.0381 | 0.0384 | 0.0381        |
|          | OROMO        | 0.0386  | 0.0388 | 0.0383        | 0.0391 | 0.0390  | 0.0388    | 0.0387   | 0.0380   | 0.0389   | 0.0388      | 0.0386 | 0.0389 | 0.0385        |
|          | SOMALI       | 0.0390  | 0.0391 | 0.0384        | 0.0394 | 0.0394  | 0.0391    | 0.0389   | 0.0380   | 0.0391   | 0.0391      | 0.0389 | 0.0393 | 0.0388        |
|          | TYGRAY       | 0.0377  | 0.0379 | 0.0380        | 0.0382 | 0.0382  | 0.0379    | 0.0377   | 0.0380   | 0.0386   | 0.0378      | 0.0377 | 0.0380 | 0.0380        |
|          | AVERAGE      | 0.0383  | 0.0385 | <b>0.0381</b> | 0.0388 | 0.0388  | 0.0385    | 0.0383   | 0.0380   | 0.0388   | 0.0385      | 0.0383 | 0.0386 | <b>0.0383</b> |

| <b>B</b> | Non-African Component Only | Bedouin | Druze  | Egyptian      | Greek  | Iranian | Jordanian | Lebanese | Moroccan | Mozabite | Palestinian | Saudi  | Syrian | Yemeni        |
|----------|----------------------------|---------|--------|---------------|--------|---------|-----------|----------|----------|----------|-------------|--------|--------|---------------|
|          | AMHARA                     | 0.0373  | 0.0374 | 0.0372        | 0.0375 | 0.0376  | 0.0373    | 0.0373   | 0.0377   | 0.0377   | 0.0374      | 0.0372 | 0.0373 | 0.0375        |
|          | ESOMALI                    | 0.0377  | 0.0379 | 0.0376        | 0.0380 | 0.0380  | 0.0377    | 0.0378   | 0.0381   | 0.0381   | 0.0378      | 0.0377 | 0.0379 | 0.0378        |
|          | OROMO                      | 0.0377  | 0.0378 | 0.0375        | 0.0379 | 0.0380  | 0.0378    | 0.0377   | 0.0380   | 0.0379   | 0.0377      | 0.0376 | 0.0378 | 0.0379        |
|          | SOMALI                     | 0.0379  | 0.0381 | 0.0377        | 0.0383 | 0.0383  | 0.0380    | 0.0380   | 0.0381   | 0.0382   | 0.0379      | 0.0379 | 0.0381 | 0.0381        |
|          | TYGRAY                     | 0.0370  | 0.0373 | 0.0368        | 0.0373 | 0.0374  | 0.0372    | 0.0371   | 0.0375   | 0.0375   | 0.0371      | 0.0370 | 0.0372 | 0.0373        |
|          | AVERAGE                    | 0.0375  | 0.0377 | <b>0.0373</b> | 0.0378 | 0.0379  | 0.0376    | 0.0376   | 0.0379   | 0.0379   | 0.0376      | 0.0375 | 0.0376 | <b>0.0377</b> |



**Table S4. 40-SNP Windows Showing an Outlier Number of Non-African Chromosomes in the Majority of the Semitic-Cushitic and Ari Blacksmith Populations**

| Number of populations showing a given Z score per given region | Z-scores bins for the proportion of European haplotypes in each 40 SNP window |          |      |      |     |     |          |          |
|----------------------------------------------------------------|-------------------------------------------------------------------------------|----------|------|------|-----|-----|----------|----------|
|                                                                | -3.5                                                                          | -2.5     | -1.5 | -0.5 | 0.5 | 1.5 | 2.5      | 3.5      |
| <b>1</b>                                                       | 9                                                                             | 87       | 362  | 469  | 487 | 384 | 82       | 0        |
| <b>2</b>                                                       | 0                                                                             | 29       | 217  | 476  | 454 | 231 | 25       | 0        |
| <b>3</b>                                                       | <b>1</b>                                                                      | <b>5</b> | 103  | 348  | 332 | 116 | <b>8</b> | <b>0</b> |
| <b>4</b>                                                       | <b>0</b>                                                                      | <b>4</b> | 51   | 132  | 139 | 42  | <b>6</b> | <b>0</b> |
| <b>5</b>                                                       | <b>0</b>                                                                      | <b>0</b> | 6    | 37   | 24  | 16  | <b>0</b> | <b>0</b> |

**Genomic regions showing deficiency (light grey) or excess (dark grey) of non-African component**

| Chr | Start     | End       | Z-score     |
|-----|-----------|-----------|-------------|
| 19  | 61523852  | 62240101  | <b>-3</b>   |
| 1   | 202611308 | 203863493 | <b>-2.5</b> |
| 1   | 233121260 | 234561036 | <b>-2.5</b> |
| 2   | 159910201 | 162832297 | <b>-2.5</b> |
| 12  | 114756940 | 115796582 | <b>-2.5</b> |
| 13  | 62291269  | 65337535  | <b>-2.5</b> |
| 15  | 27642703  | 29438608  | <b>-2.5</b> |
| 15  | 31797258  | 32775283  | <b>-2.5</b> |
| 17  | 18231718  | 21377174  | <b>-2.5</b> |
| 18  | 14930293  | 19200794  | <b>-2.5</b> |
| 1   | 238073408 | 238678237 | <b>2.5</b>  |
| 5   | 149063400 | 149839428 | <b>2.5</b>  |
| 5   | 149875685 | 150607133 | <b>2.5</b>  |
| 6   | 154486907 | 155207161 | <b>2.5</b>  |
| Chr | Start     | End       | Z-score     |
| 7   | 95305557  | 96856821  | <b>2.5</b>  |

|    |           |           |     |
|----|-----------|-----------|-----|
| 7  | 155434633 | 155960870 | 2.5 |
| 8  | 132605749 | 133525623 | 2.5 |
| 11 | 102147471 | 103368144 | 2.5 |
| 12 | 123717947 | 124441419 | 2.5 |
| 14 | 21063338  | 21641738  | 2.5 |
| 15 | 45473882  | 47025722  | 2.5 |
| 15 | 51368181  | 52099177  | 2.5 |
| 15 | 68167541  | 69443763  | 2.5 |
| 19 | 1290058   | 2416737   | 2.5 |

**\*\*includes SLC24A\*\***

The number of regions showing a given Z-score in the specified number of populations is reported. Regions showing Z-scores <-2 (light grey) or >2 (dark grey) in at least 3 populations were considered outlier. The genomic coordinates on the highlighted windows are reported below.
